# Supplementary material
Source: PubMed Central journal article supplement (PMC5497314)
Supplement: NIHMS870285-supplement-Supplement.pdf [file NIHMS870285-supplement-Supplement.pdf]

Supplemental table 1. Baseline characteristics of participants in TBTC Studies 22, 23, 27, and 28 included in the present analysis.

| <b>Characteristic</b>                  | <b>Study 22</b><br>n=1075 | <b>Study 23</b><br>n=181 | <b>Study 27</b><br>n=322 | <b>Study 28</b><br>n=420 |
|----------------------------------------|---------------------------|--------------------------|--------------------------|--------------------------|
| Age, years, median (IQR)               | 43 (33,53)                | 40 (34, 46)              | 32 (24, 42)              | 31 (25, 40)              |
| Female, n (%)                          | 265 (25)                  | 36 (21)                  | 110 (34)                 | 119 (28)                 |
| Race/ethnicity                         |                           |                          |                          |                          |
| Hispanic, n (%)                        | 263 (24)                  | 57 (34)                  | 50 (15)                  | 74 (18)                  |
| White, non-Hispanic, n (%)             | 184 (17)                  | 19 (11)                  | 19 (6)                   | 27 (6)                   |
| Black, non-Hispanic, n (%)             | 452 (42)                  | 84 (50)                  | 222 (69)                 | 274 (65)                 |
| Other non-Hispanic, n (%)              | 176 (16)                  | 9 (5)                    | 31 (10)                  | 45 (11)                  |
| Born outside USA or Canada, n (%)      | 379 (35)                  | 69 (41)                  | 264 (82)                 | 374 (89)                 |
| Enrollment at an African site, n (%)   | not applicable            | not applicable           | 187 (58)                 | 241 (57)                 |
| Weight, kg, median (IQR)               | 59 (52, 68)               | 63 (56, 72)              | 55 (49, 62)              | 56 (50, 62)              |
| Underweight, n (%)                     | 330 (31)                  | not recorded             | 133 (41)                 | 192 (46)                 |
| BMI, kg/m <sup>2</sup> , median (IQR)  | not recorded              | 21 (20, 24)              | 20 (18, 22)              | 20 (18, 22)              |
| BMI < 18.5 kg/m <sup>2</sup> , n (%)   | not recorded              | 20 (11)                  | 100 (31)                 | 142 (34)                 |
| Less than high school education, n (%) | 582 (55)                  | 87 (51)                  | 211 (66)                 | 296 (70)                 |
| Homeless, n (%)                        | 211 (20)                  | 45 (27)                  | 17 (5)                   | 15 (4)                   |
| Elicit drug use, n (%)                 | 247 (23)                  | 17 (10)                  | 25 (8)                   | 38 (9)                   |
| Alcohol use, n (%)                     | 478 (45)                  | 57 (34)                  | 35 (11)                  | 54 (13)                  |
| Cigarette use, n (%)                   | not recorded              | not recorded             | 141 (44)                 | 169 (40)                 |
| Previous TB treatment, n (%)           | 81 (8)                    | 5 (3)                    | 13 (4)                   | 10 (2)                   |
| Extrapulmonary TB, n (%)               | 53 (5)                    | 76 (45)                  | 13 (4)                   | 36 (9)                   |
| Cavities on chest radiograph, n (%)    | 477 (47)                  | 18 (10)                  | 229 (71)                 | 308 (73)                 |
| Bilateral lung involvement, n (%)      | 541 (51)                  | 94 (57)                  | 190 (59)                 | 234 (56)                 |
| Hemoglobin, g/dL, median (IQR)         | 12.4 (11.0, 13.8)         | 11.4 (10.4, 12.7)        | 11.4 (9.7, 13.2)         | 12.2 (10.6, 13.5)        |
| HIV-positive, n (%)                    | 71 (7)                    | 169 (100)                | 72 (22)                  | 45 (11)                  |
| CD4 cell count/ $\mu$ L, median (IQR)  | not recorded              | 90 (35, 175)             | 196 (74, 312)            | 197 (103, 333)           |

Supplemental table 2. Questionnaire items used to summarize baseline participant characteristics in TBTC Studies 22, 23, 27, and 28.

| Characteristic                  | Study 22                                                                                                                                                      | Study 23                                                                                                             | Study 27                                                                                                             | Study 28                                                                                                             |
|---------------------------------|---------------------------------------------------------------------------------------------------------------------------------------------------------------|----------------------------------------------------------------------------------------------------------------------|----------------------------------------------------------------------------------------------------------------------|----------------------------------------------------------------------------------------------------------------------|
| Age, years                      | Date of birth                                                                                                                                                 | Date of Birth                                                                                                        | Date of Birth                                                                                                        | Date of Birth                                                                                                        |
| Female                          | Gender                                                                                                                                                        | Patient Gender                                                                                                       | Patient Gender                                                                                                       | Patient Gender                                                                                                       |
| Race/ethnicity                  | Race/Ethnic Origin                                                                                                                                            | Race, Ethnic Origin                                                                                                  | Ethnic Origin, Race                                                                                                  | Ethnic Origin, Race                                                                                                  |
| Born outside USA or Canada      | Place of birth                                                                                                                                                | Place of birth                                                                                                       | Place of birth                                                                                                       | Place of birth                                                                                                       |
| Weight, kg                      | Person's weight                                                                                                                                               | Person's weight                                                                                                      | Patient's weight                                                                                                     | Patient's weight                                                                                                     |
| BMI, kg/m <sup>2</sup>          | [not recorded]                                                                                                                                                | [not recorded]                                                                                                       | Patient's weight, Patient's height                                                                                   | Patient's weight, Patient's height                                                                                   |
| Less than high school education | Education: (Select highest year completed), Eighth grade or less, More than eighth grade but less than twelfth grade                                          | Education: (Select highest year completed), Eighth grade or less, More than eighth grade but less than twelfth grade | Education: (Select highest year completed), Eighth grade or less, More than eighth grade but less than twelfth grade | Education: (Select highest year completed), Eighth grade or less, More than eighth grade but less than twelfth grade |
| Homeless                        | During the 5 years prior to the current episode of TB, does the patient report a history of being homeless or living in a shelter or SRO hotel for > 6 months | Does the patient have a history of being homeless or living in a shelter or SRO hotel within the past year?          | homeless within past year                                                                                            | homeless within past year                                                                                            |
| Drug use                        | During the 5 years prior to the current episode of TB, does the patient report a history of using illicit drugs                                               | Does the patient have a history of using illicit injecting or non-injecting drugs within the past year? Ever?        | injecting drug use within past year, non-injecting drug use within past year                                         | injecting drug use within past year, non-injecting drug use within past year                                         |
| Alcohol use                     | During the 5 years prior to the current episode of TB, does the patient report a history of using alcohol (> 1 drink per day)                                 | Does the patient have a history of using excess alcohol within the past year?                                        | excess alcohol use within past year                                                                                  | excess alcohol use within past year                                                                                  |

| <b>Characteristic</b>        | <b>Study 22</b>                                                  | <b>Study 23</b>                                                     | <b>Study 27</b>                                                                                                | <b>Study 28</b>                                                                                                |
|------------------------------|------------------------------------------------------------------|---------------------------------------------------------------------|----------------------------------------------------------------------------------------------------------------|----------------------------------------------------------------------------------------------------------------|
| Cigarette use                | [not recorded]                                                   | [not recorded]                                                      | History of cigarette smoking                                                                                   | History of cigarette smoking                                                                                   |
| Previous TB treatment        | Was the patient ever treated for active TB prior to this episode | Was the patient ever treated for active TB prior to this episode    | Was the patient ever treated for active TB prior to this episode                                               | Was the patient ever treated for active TB prior to this episode                                               |
| Extrapulmonary TB            | Pulmonary and extrapulmonary tuberculosis                        | Clinical extrapulmonary tuberculosis, both                          | If both clinical pulmonary and extrapulmonary tuberculosis specify anatomic code for extrapulmonary sites only | If both clinical pulmonary and extrapulmonary tuberculosis specify anatomic code for extrapulmonary sites only |
| Cavities on chest radiograph | Chest x-ray findings, cavities                                   | Chest x-ray findings, cavities (left or right lung)                 | Chest x-ray findings, cavities (left or right lung)                                                            | Chest x-ray findings, cavities (left or right lung)                                                            |
| Bilateral lung involvement   | Chest x-ray findings, bilateral disease                          | Chest x-ray findings, infiltrates or cavities (left and right lung) | Chest x-ray findings, infiltrates or cavities (left and right lung)                                            | Chest x-ray findings, infiltrates or cavities (left and right lung)                                            |
| Hemoglobin, g/dL             | Hemoglobin                                                       | Hemoglobin                                                          | Hemoglobin                                                                                                     | Hemoglobin                                                                                                     |
| HIV-positive                 | Results of HIV test                                              | Date of positive HIV test                                           | HIV test status                                                                                                | HIV test status                                                                                                |
| CD4 cell count/ $\mu$ L      | [not recorded]                                                   | CD4 cells/ $\text{mm}^3$                                            | CD4 cells/ $\text{mm}^3$                                                                                       | CD4 cells/ $\text{mm}^3$                                                                                       |
